# Supplementary material for: Feeding Period Restriction Alters the Expression of Peripheral Circadian Rhythm Genes without Changing Body Weight in Mice
Source: PubMed Central journal article supplement (PMC3499481; doi:10.1371/journal.pone.0049993), 2012-11-15
Supplement: pone.0049993.s001.pdf [file pone.0049993.s001.pdf]

# Figure S1

**A**

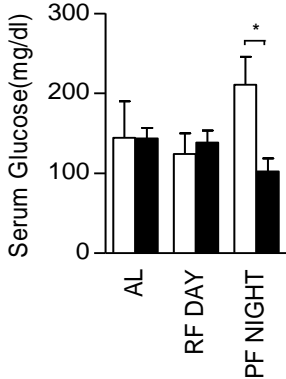

**B**

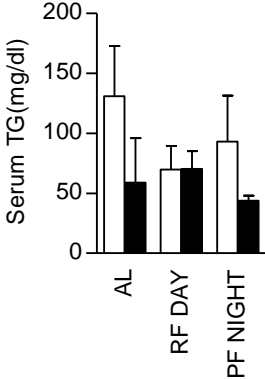

**C**

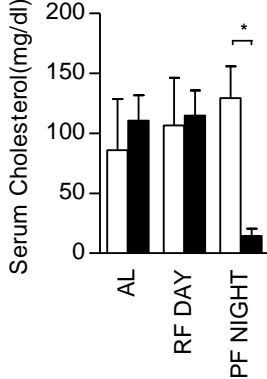

Legend:  
□ ZT2  
■ ZT14
