# Supplementary material for: Feeding Period Restriction Alters the Expression of Peripheral Circadian Rhythm Genes without Changing Body Weight in Mice
Source: PubMed Central journal article supplement (PMC3499481; doi:10.1371/journal.pone.0049993), 2012-11-15
Supplement: pone.0049993.s002.pdf [file pone.0049993.s002.pdf]

**Table S1.**  
**Sequences of Primers for Real-Time PCR**

| <b>Gene</b>    | <b>Primer Sequence</b>                                       |
|----------------|--------------------------------------------------------------|
| Clock          | 5'-TTGCGTCTGTGGGTGTTG-3'<br>5'-TGCTTTGTCCTTGTCATCTTCT-3'     |
| Bmal1          | 5'-AACCTTCCCGCAGCTAACAG-3'<br>5'-AGTCTCTTTGGGCCACCTT-3'      |
| Per2           | 5'-TGTGCGATGATGATTCGTGA-3'<br>5'-GGTGAAGGTACGTTTGGTTTGC-3'   |
| TBP            | 5'-GGGAGAATCATGGACCAGAA-3'<br>5'-CCGTAAGGCATCATTGGACT-3'     |
| Srebp1c        | 5'-GGAGCCATGGATTGCACATT-3'<br>5'-CAGGAAGGCTTCCAGAGAGG-3'     |
| Fasn           | 5'-GCTGCGGAAACTTCAGGAAAT-3'<br>5'-AGAGACGTGTCACTCCTGGACTT-3' |
| G6pase         | 5'-ACACCGACTACTACAGCAACAG-3'<br>5'-CCTCGAAAGATAGCAAGAGTAG-3' |
| Pepck          | 5'-AAAAGCCTTTGGTCAACAAC-3'<br>5'-AAACTTCATCCAGGCAATGT-3'     |
| Cpt1           | 5'-ACTCCTGGAAGAAGAAGTTCAT-3'<br>5'-AGTATCTTTGACAGCTGGGAC-3'  |
| Ppara $\alpha$ | 5'-ATGCCAGTACTGCCGTTTTTC-3'<br>5'-GGCCTTGACCTTGTTTCATGT-3'   |
